# Supplementary material for: Evaluating the Effect of Lenvatinib on Sorafenib-Resistant Hepatocellular Carcinoma Cells
Source: MDPI journal article supplement (doi:10.3390/ijms222313071), 2021-12-02
Supplement: s1 [file s1]

Figure S2. Lenvatinib affects microRNA expression in Huh-7SR cells. Hierarchical clustering of differentially expressed miRNAs from Huh-7SR cells incubated with 10  $\mu$ M lenvatinib or DMSO for 24 h. Fold Change >1.5 or <0.67, FDR<0.001.

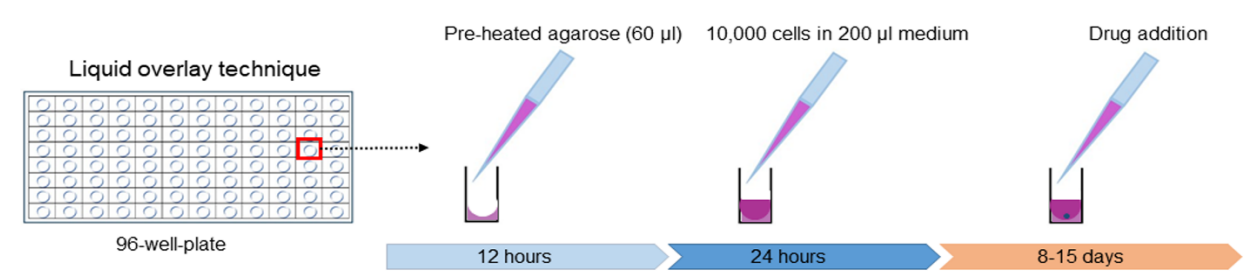

Figure S3. Schematic diagram of three-dimensional tumor spheroid assay by liquid overlay technique.

Table S1. Kinase inhibition profile.

| TKR    | Lenvatinib IC50 ( $\mu$ M) | Sorafenib IC50 ( $\mu$ M) |
|--------|----------------------------|---------------------------|
| FGFR1  | 0.061                      | 0.34                      |
| FGFR2  | 0.027                      | 0.15                      |
| FGFR3  | 0.052                      | 0.34                      |
| FGFR4  | 0.043                      | 3.4                       |
| VEGFR1 | 0.0047                     | 0.021                     |
| VEGFR2 | 0.003                      | 0.021                     |
| VEGFR3 | 0.0023                     | 0.016                     |
| RET    | 0.0064                     | 0.015                     |
